# Supplementary figures and images for: Effects of Staphylococcus aureus Bacteriophage K on Expression of Cytokines and Activation Markers by Human Dendritic Cells In Vitro
Source: MDPI journal article supplement (doi:10.3390/v10110617), 2018-11-08

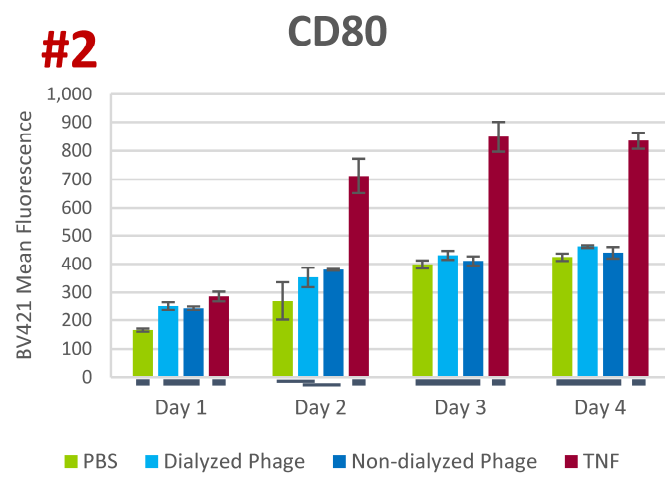

**Supplemental Figure S1.** CD80 expression during experiment #2.

Supplement: s1 [file s1]
